# Supplementary material
Source: PubMed Central journal article supplement (PMC2758806)
Supplement: supp_122_20_3772__1.pdf [file supp_122_20_3772__1.pdf]

**Table S1. Effects of redox-related small molecules or proteins on nuclear export**

| <b>Small molecules</b>        |                                                                                                        |                                                                                                         |                          |
|-------------------------------|--------------------------------------------------------------------------------------------------------|---------------------------------------------------------------------------------------------------------|--------------------------|
| Reagents                      | Full name                                                                                              | Description                                                                                             | Effect on nuclear export |
| Vc                            | Vitamin C/L-ascorbic acid                                                                              | Antioxidant vitamin                                                                                     | –                        |
| GSH                           | Reduced glutathione/ L- $\gamma$ -glutamyl-L-cysteinyl-glycine                                         | Prevalent low-molecular-weight thiol in mammalian cells                                                 | –                        |
| NAC                           | <i>N</i> -Acetylcysteine                                                                               | Glutathione precursor, also acting as an antioxidant                                                    | –                        |
| BSO                           | Buthionine sulfoximine                                                                                 | Inhibitor of $\gamma$ -glutamylcysteine synthetase, a key enzyme in glutathione biosynthesis            | –                        |
| Auranofin                     | <i>S</i> -Triethylphosphine-gold(I)-2,3,4,6-tetra- <i>O</i> -acetyl-1-thio- $\beta$ -D-glucopyranoside | Inhibitor of TrxR                                                                                       | –                        |
| H2O2                          | Hydrogen peroxide                                                                                      | Strong oxidant, intracellular signaling molecule                                                        | –                        |
| GSNO                          | <i>S</i> -Nitrosoglutathione                                                                           | The main non-protein S-nitrosothiol (SNO) in cells, which functions in an equilibrium with protein SNOs | +                        |
| <b>Overexpressed proteins</b> |                                                                                                        |                                                                                                         |                          |
| Protein                       | Full name                                                                                              | Description                                                                                             | Effect on nuclear export |
| Trx                           | Thioredoxin                                                                                            | Antioxidant protein                                                                                     | –                        |
| TrxR                          | Thioredoxin reductase                                                                                  | Antioxidant protein                                                                                     | –                        |
| Grx                           | Glutaredoxin                                                                                           | Antioxidant protein                                                                                     | –                        |
| DJ-1                          | PARK7                                                                                                  | Antioxidant protein                                                                                     | –                        |
| PDI                           | Protein disulfide isomerase                                                                            | Thiol/disulfide oxidoreductases                                                                         | –                        |
| APE1/Ref-1                    | Apurinic apyrimidinic endonuclease/redox effector factor-1                                             | Antioxidant protein                                                                                     | –                        |

For screening of small molecules, HEK293T cells transiently expressing Rev1.4+NES-GFP were treated with indicated reagents at various reference-recommended concentrations and durations (not shown). Results show that treatment of cells with GSNO (1-5 mM) for 4 hours results in clear nuclear accumulation of the reporter. To determine the effect of redox-related proteins on nuclear export, HEK293T cells were transfected with Rev1.4+NES-GFP, together with indicated mammalian expression vectors for those proteins, and 48 hours later the GFP fluorescence was examined. In addition, no discernable effect on the localization of Rev1.4-GFP was observed for all the small molecules and proteins (not shown).
